# Supplementary material for: pH Sensitive Dextran Coated Fluorescent Nanodiamonds as a Biomarker for HeLa Cells Endocytic Pathway and Increased Cellular Uptake
Source: Nanomaterials (Basel). 2021 Jul 15;11(7):1837. doi: 10.3390/nano11071837 (PMC8308332; doi:10.3390/nano11071837)
Supplement: Supplementary file 1 [file nanomaterials-11-01837-s001.zip › nanomaterials-1297921-supplementary.pdf]

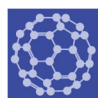

## Supplementary Materials

# pH Sensitive Dextran Coated Fluorescent Nanodiamonds as a Biomarker for HeLa Cells Endocytic Pathway and Increased Cellular Uptake

Linyan Nie <sup>†</sup>, Yue Zhang <sup>†</sup>, Lei Li, Patrick van Rijn and Romana Schirhagl <sup>\*</sup>

Department of Biomedical Engineering, University Medical Center Groningen, University of Groningen, A. Deusinglaan 1, 9713 AV, Groningen, The Netherlands; niely0316@163.com (L.N.); yue.zhang@rug.nl (Y.Z.); l.li@umcg.nl (L.L.); p.van.rijn@umcg.nl (P.V.R.)

<sup>\*</sup> Correspondence: romana.schirhagl@gmail.com

<sup>†</sup> These authors contributed equally to this work.

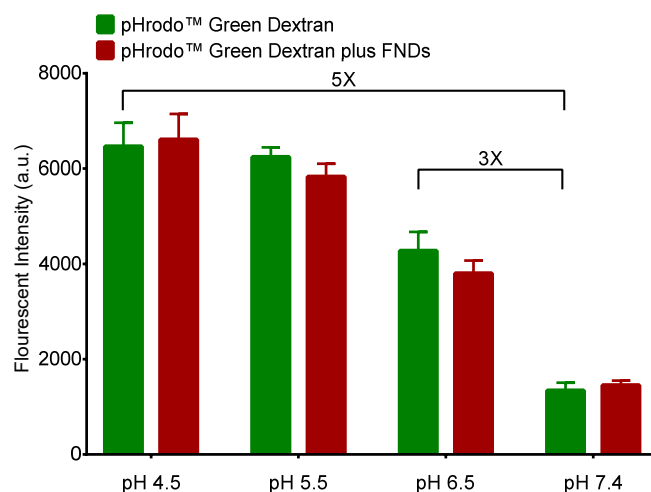

**Figure S1.** Measurement of fluorescent intensity changes in PBS at different pH values by a plate reader. These pH values were chosen according to match the inner acidic environment of endocytosis vehicles, pH = 4.5 in lysosomes, pH = 5.5 in late endosomes, pH = 6.5 in early endosomes, pH = 7.4 in cytoplasm or outer cell environment. Green colour stands for only pHrodo Green Dextran, red colour stands for pHrodo Green Dextran plus FNDs.

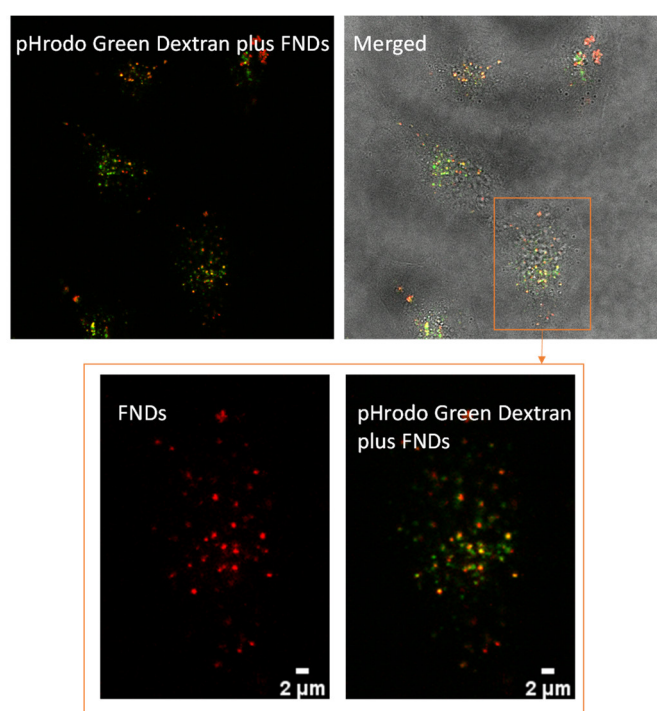

**Figure S2.** Cellular uptake of pHrodo Green Dextran adsorbed FNDs, incubation time is 0.5 + 3 hours, cells were incubated with pHrodo Green Dextran adsorbed FNDs for 0.5h and washed with PBS. Then PBS was replaced with fresh cell culture media, followed by 3 hrs incubation. Green: pHrodo Green Dextran, red: FNDs, scale bar is 2μm.

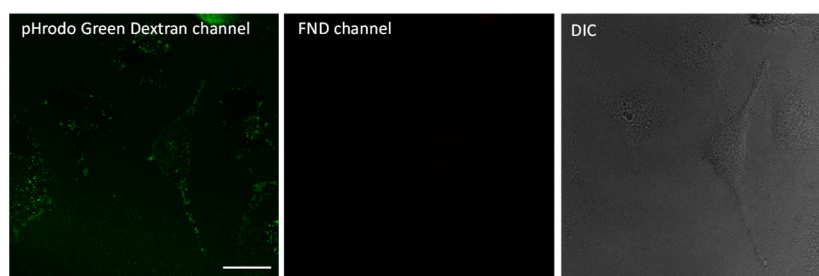

**Figure S3.** Control group; pHrodo Green Dextran incubated with cells for 0.5 hour. Green: pHrodo Green Dextran, scale bar is 20 μm.
